# Supplementary material for: Design and development of papain–urea loaded PVA nanofibers for wound debridement
Source: Royal Society of Chemistry journal article supplement (doi:10.1039/c4ra10239h), 2014-01-01
Supplement: c4ra10239h1.pdf [file c4ra10239h1.pdf]

## **SUPPORTING INFORMATION**

**Manuscript ID** – RA-ART-09-2014-010239.R2

**Manuscript Title:** Design and development of Papain/Urea loaded PVA nanofibers for wound debridement

E. Shoba, Rachita Lakra, Manikantan Syamala Kiran and Purna Sai Korrapati\*

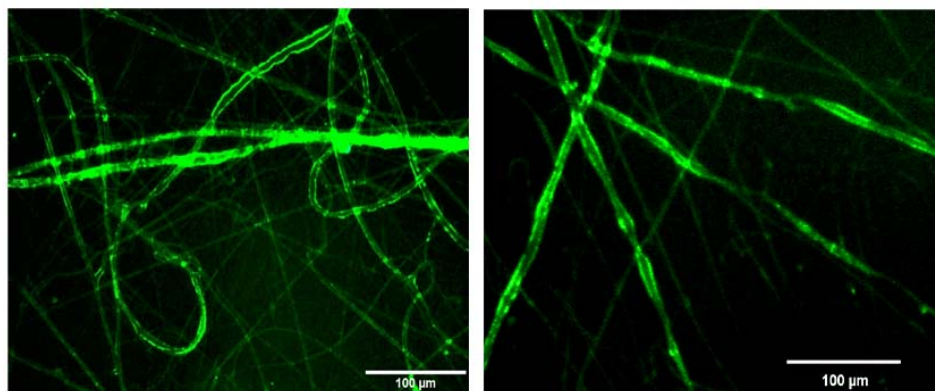

**Figure S1.** Fluorescence microscopic images of BSA-FITC loaded PVA nanofibers
